# Supplementary material for: The effect of different climate and air quality policies in China on in situ ozone production in Beijing
Source: Copernicus journal article supplement (doi:10.5194/acp-24-9031-2024), 2024-08-20
Supplement: Supplementary file 1 [file acp-24-9031-2024-supplement.pdf]

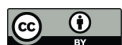

*Supplement of*

## **The effect of different climate and air quality policies in China on in situ ozone production in Beijing**

**Beth S. Nelson et al.**

*Correspondence to:* Beth S. Nelson ([beth.nelson@york.ac.uk](mailto:beth.nelson@york.ac.uk))

The copyright of individual parts of the supplement might differ from the article licence.

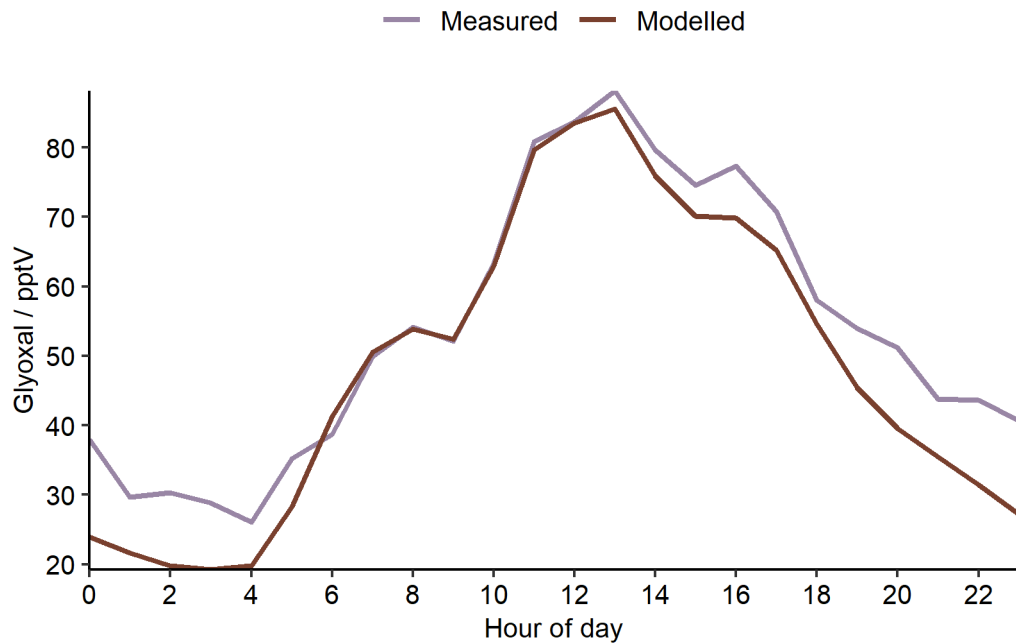

**Figure S1:** Diel mean campaign mixing ratios of glyoxal (purple) and modelled mixing ratios of glyoxal (brown).
